# Supplementary material for: Sub-100 nm nanoplastics: potent carriers of tributyltin in marine water
Source: Royal Society of Chemistry journal article supplement (doi:10.1039/d3en00659j), 2023-11-17
Supplement: d3en00659j1.pdf [file d3en00659j1.pdf]

## Sub-100 nm Nanoplastics: Potent Carriers of Tributyltin in Marine Water

**Jason Raymond**, *Monica Felipe Sotelo*, *Rachida Bance-Soualhi*, *Carol Crean*, *Maya Al-Sid-Cheikh*\*

*School of Chemistry and Chemical Engineering, University of Surrey, Stag Hill, Guildford, GU2 7XH, United Kingdom*

\*Corresponding Author: *Dr Maya Al-Sid-Cheikh*, [m.alsidcheikh@surrey.ac.uk](mailto:m.alsidcheikh@surrey.ac.uk)

### Figures

S1: DLS Size Distribution

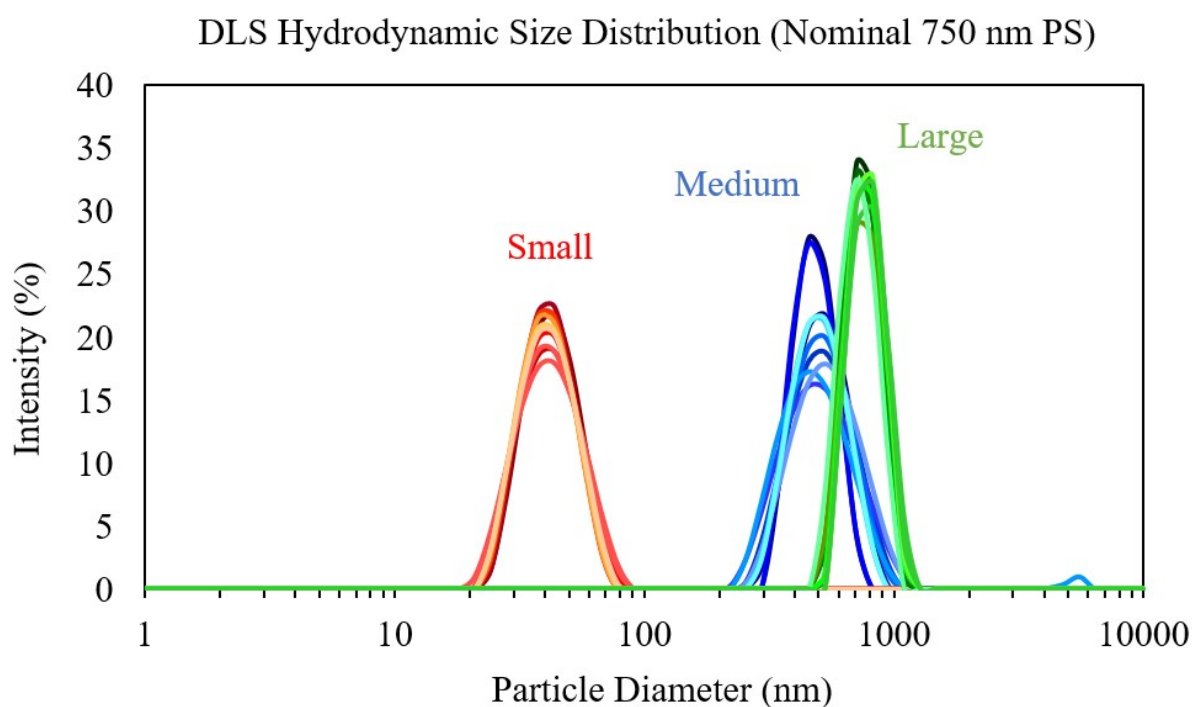

*Fig. S1: Dynamic Light Scattering (DLS) measured hydrodynamic diameter distribution for 3 sizes of polystyrene nanoplastic (Large: 765 nm, Medium: 485 nm and Small: 40 nm). Each curve represents 10 instrument replicates, in addition to the 10 experimental replicates.*

S2: Large PS SEM Image

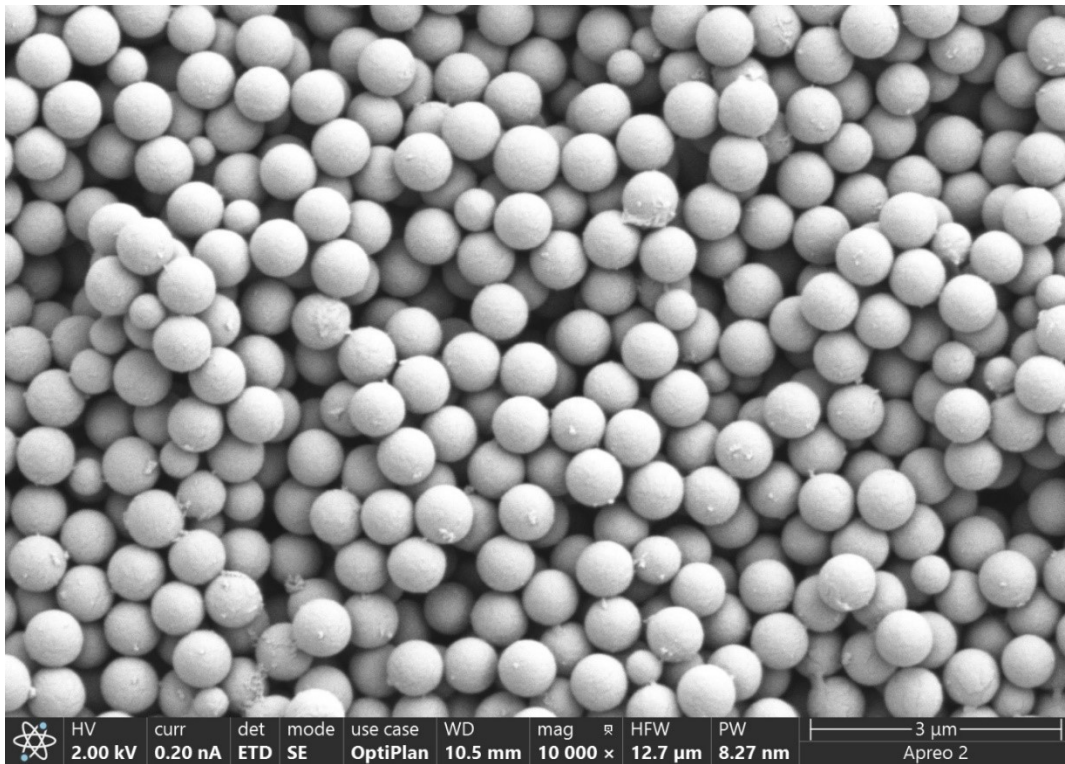

Fig. S2: Scanning Electron Microscopy (SEM, 0.2 nA, 2 KeV, 10000x mag.) image for Large polystyrene nanoparticles (dried via capillary action with filter paper, 6 nm gold sputter coated)

S3: Medium PS SEM Image

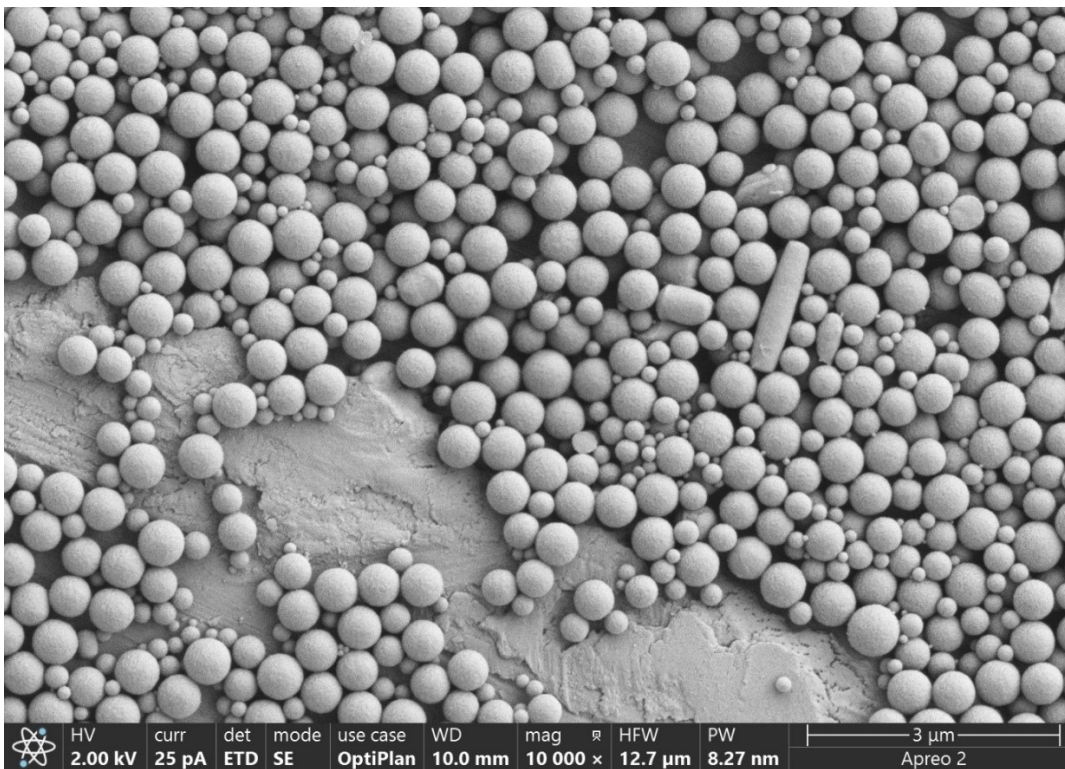

Fig. S3: Scanning Electron Microscopy (SEM, 0.025 nA, 2 KeV, 10000x mag.) image for Medium polystyrene nanoparticles (dried via capillary action with filter paper, 6 nm gold sputter coated)

S4: Small PS SEM Image

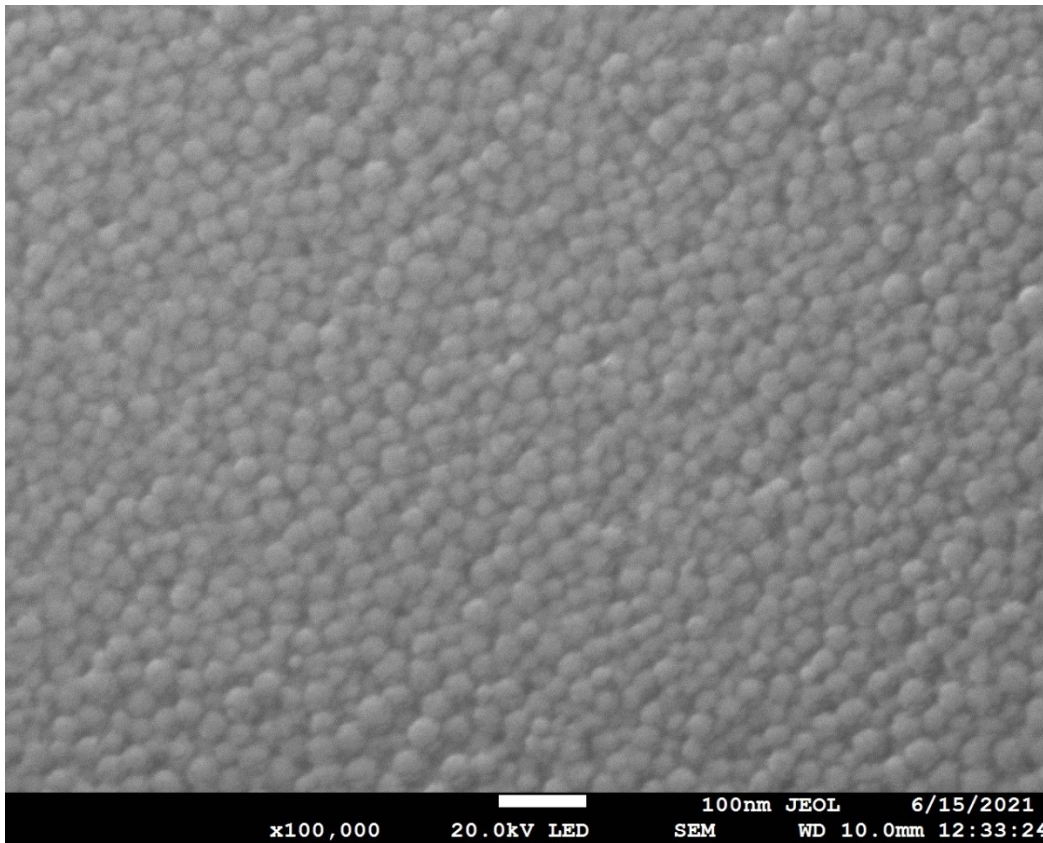

*Fig. S4: Scanning Electron Microscopy (SEM, 0.2 nA, 20 KeV, 100000x mag.) image for Small polystyrene nanoparticles (dried via capillary action with filter paper, 6 nm gold sputter coated)*

S5: Large PS BET Adsorption Isotherm

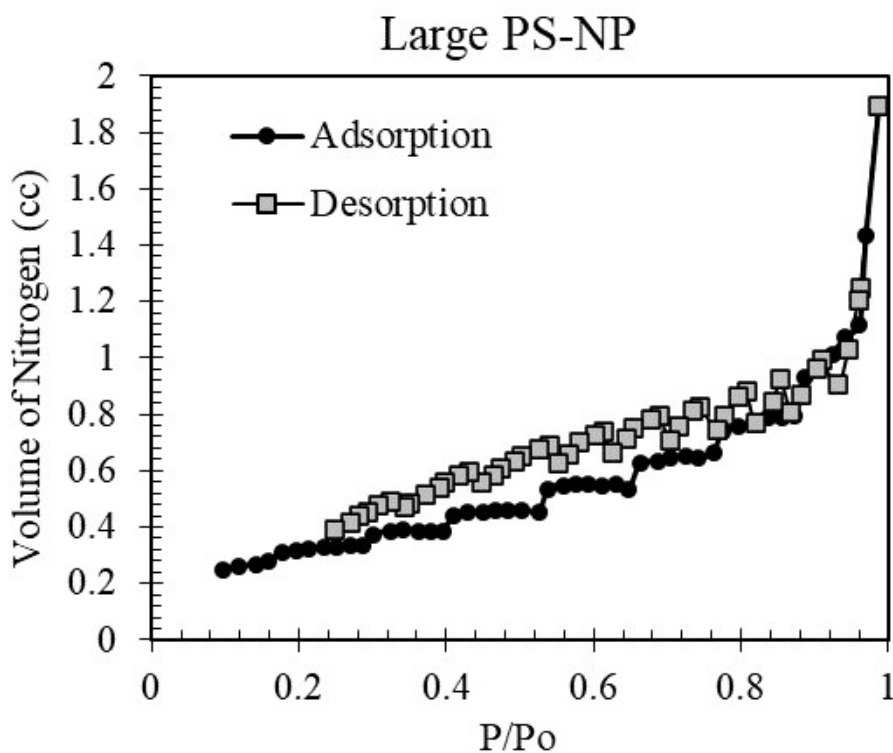

Fig. S5: BET adsorption and desorption isotherms for Large polystyrene nanoparticles under nitrogen pressure between 0.1 and 0.99  $P/P_0$ , following outgassing at 70°C.

S6: Medium PS BET Adsorption Isotherm

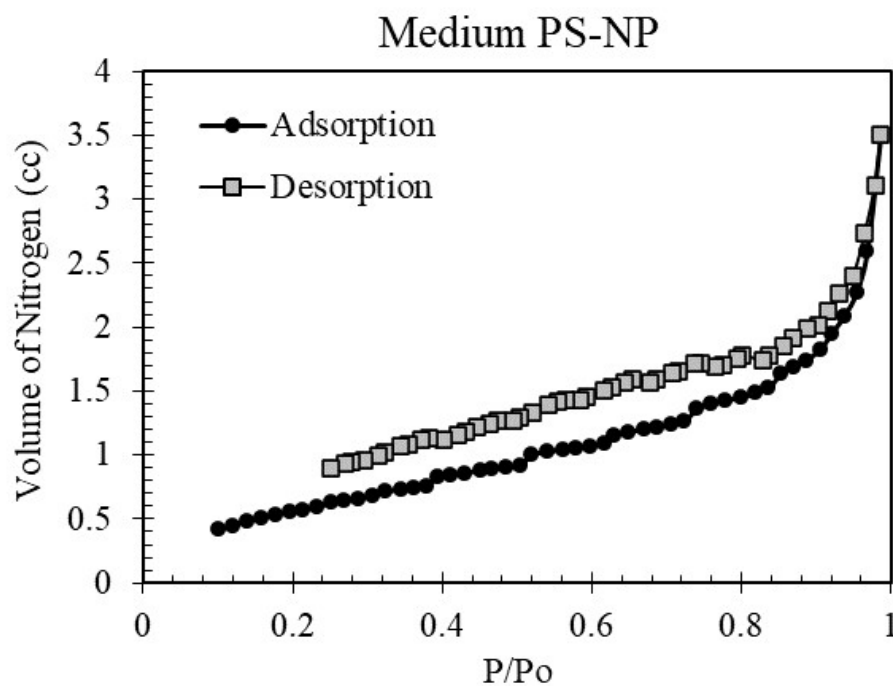

Fig. S6: BET adsorption and desorption isotherms for Medium polystyrene nanoparticles under nitrogen pressure between 0.1 and 0.99  $P/P_0$ , following outgassing at 70°C.

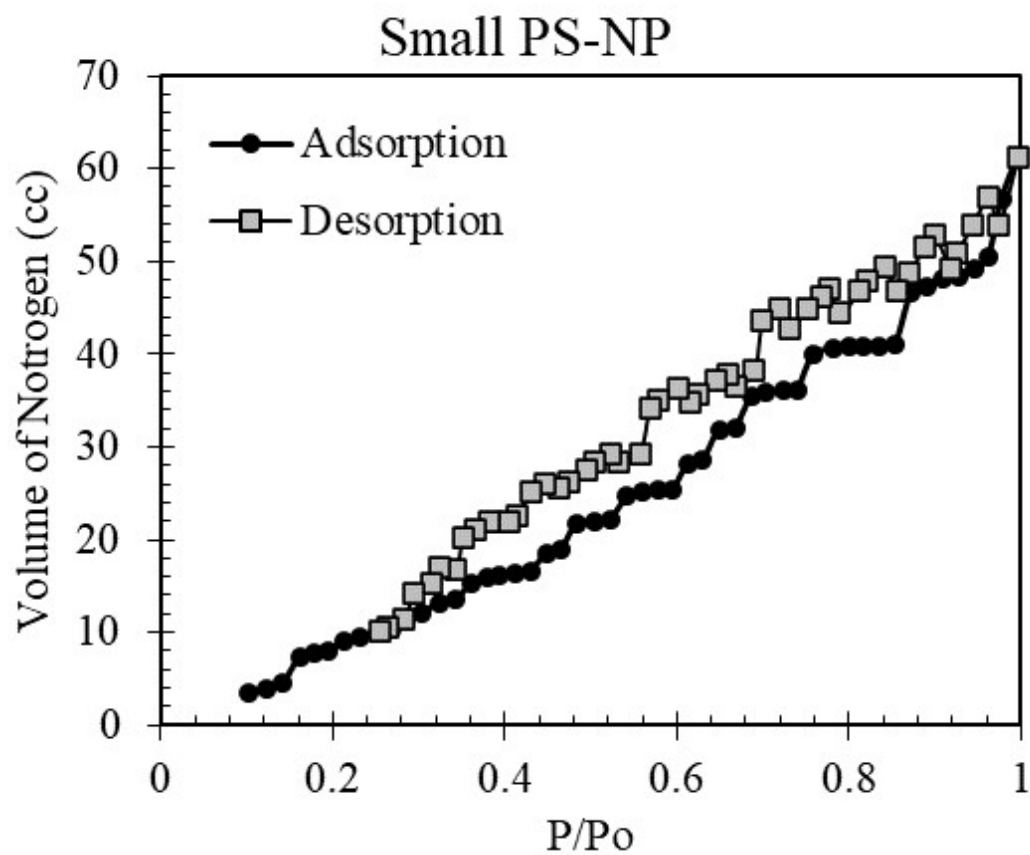

Fig. S7: BET adsorption and desorption isotherms for Small polystyrene nanoparticles under nitrogen pressure between 0.1 and 0.99  $P/P_o$ , following outgassing at 70°C.

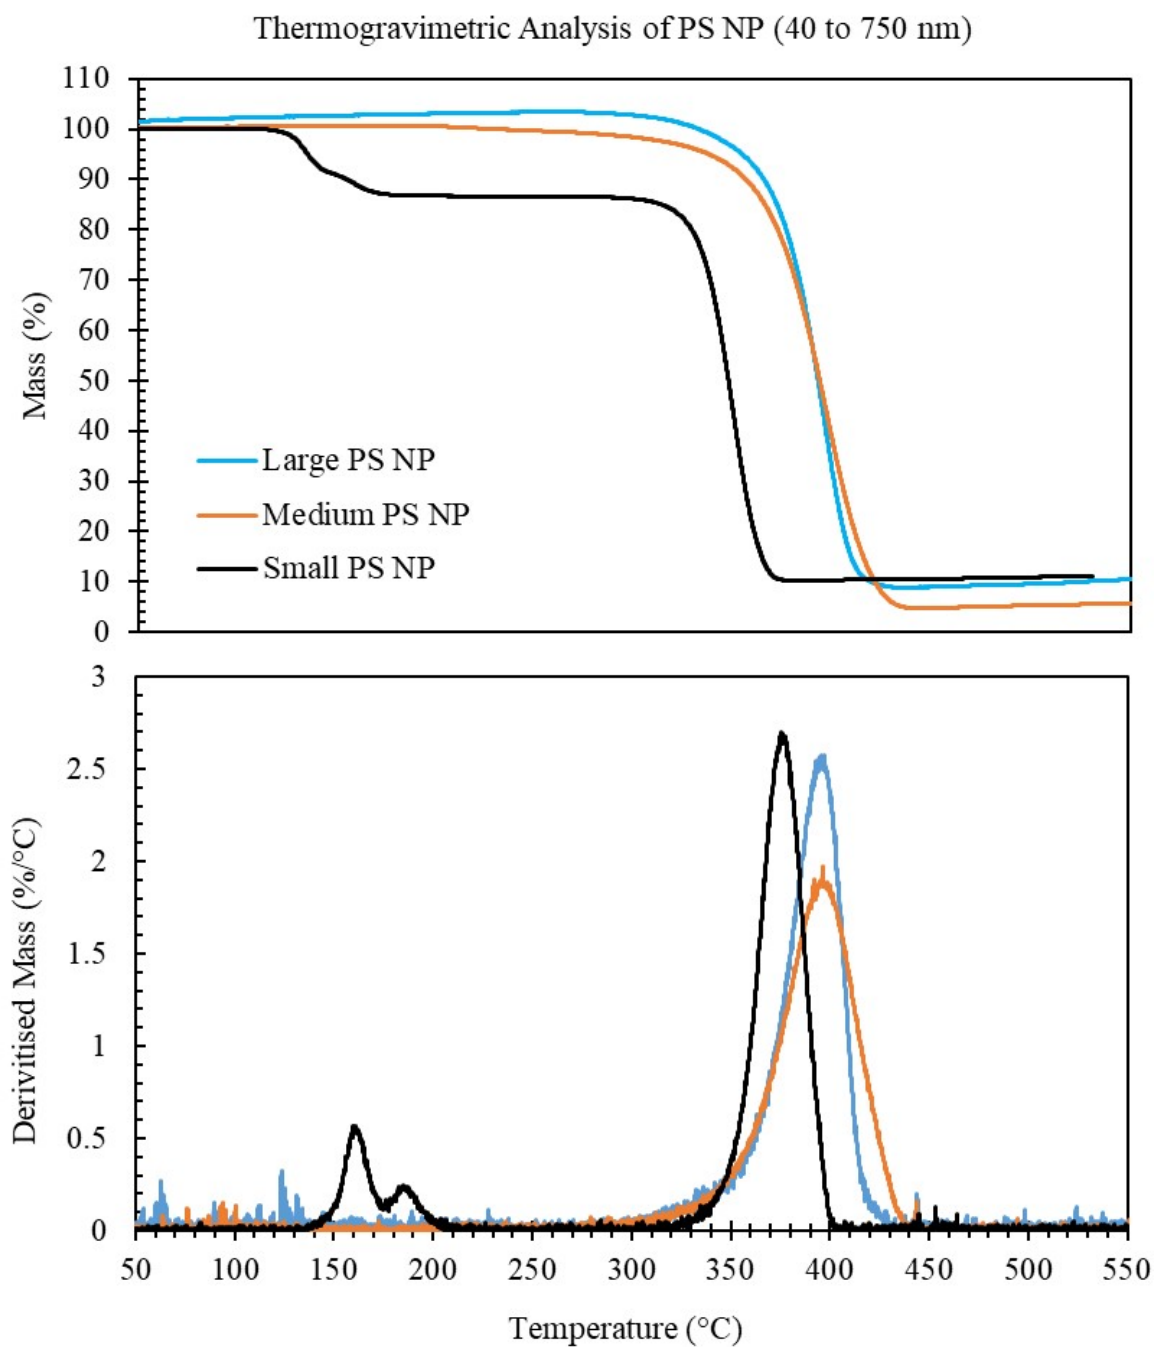

Fig. S8: Absolute and derivatised mass loss analysis by thermogravimetric analysis of Large, Medium and Small polystyrene nanoparticles between 50 and 550°C.

S9: Raman Spectra

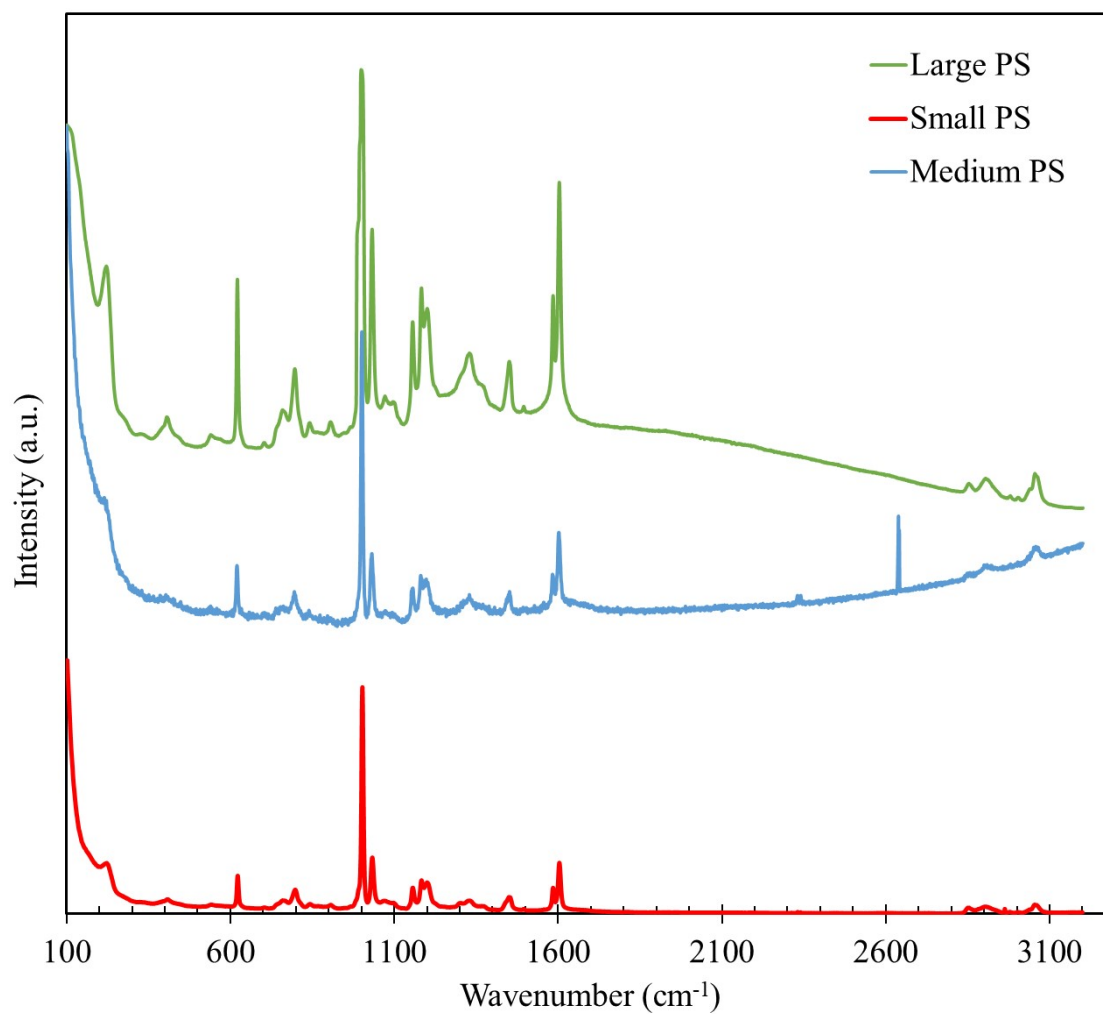

*Fig. S9: Raman Spectra (785 nm laser, 100% laser power, 50XL objective) for Large, Medium, and Small polystyrene nanoparticles.*

S10: FTIR Spectra

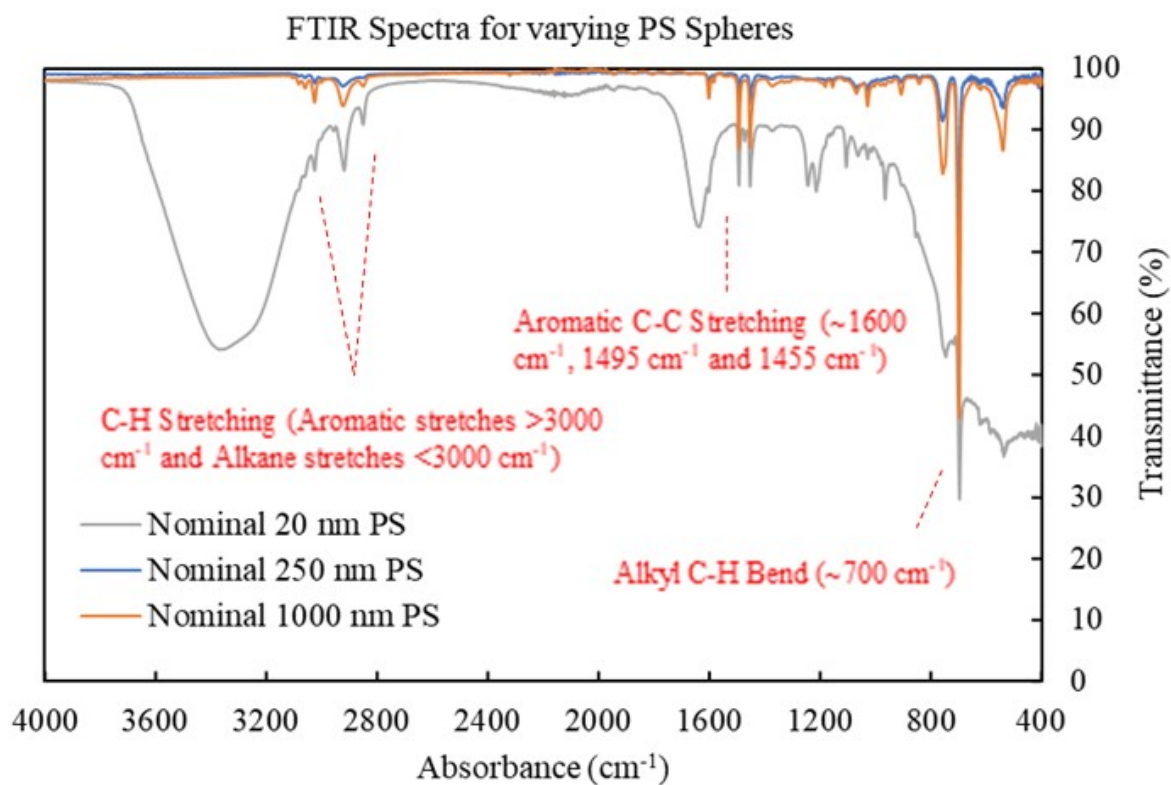

Fig. S10: FTIR Spectra for Large, Medium, and Small polystyrene nanoparticles.



S11:  $Q_{SAT}$  and  $K_D$  values of adsorption

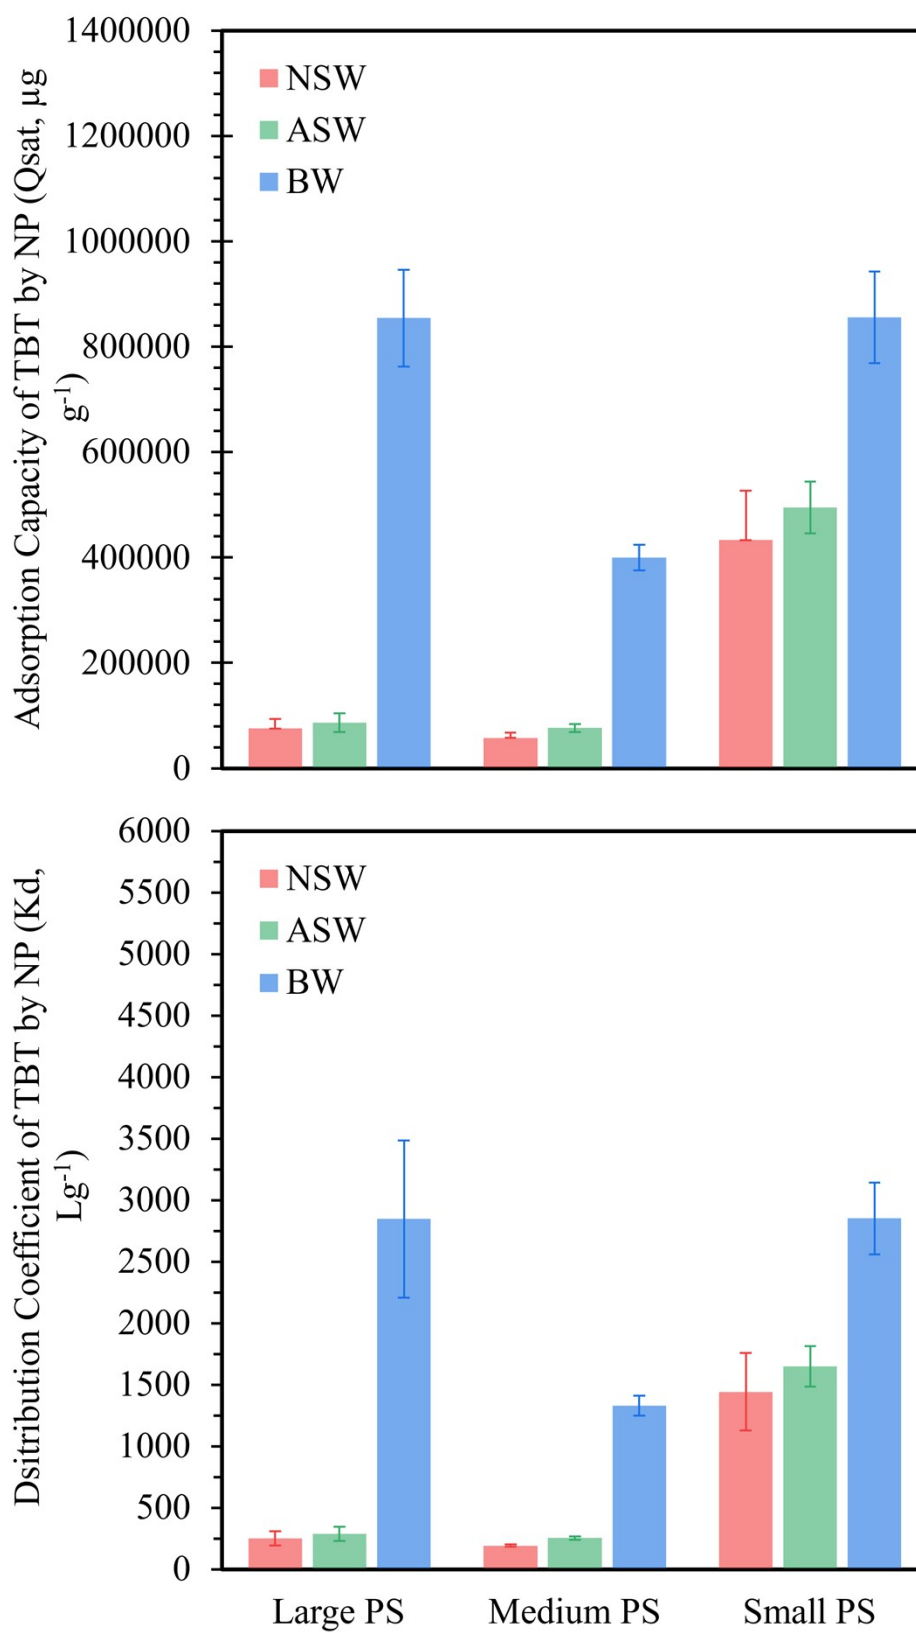

Fig. S11: Adsorption capacity ( $\mu\text{g g}^{-1}$ ) and distribution coefficient ( $L\text{g}^{-1}$ ) for Large, Medium, and Small polystyrene nanoparticles within natural seawater (NSW), brackish water (BW) and artificial seawater (ASW).

S12: Raman Adsorption Mechanism for Large Nanopolystyrene Particles

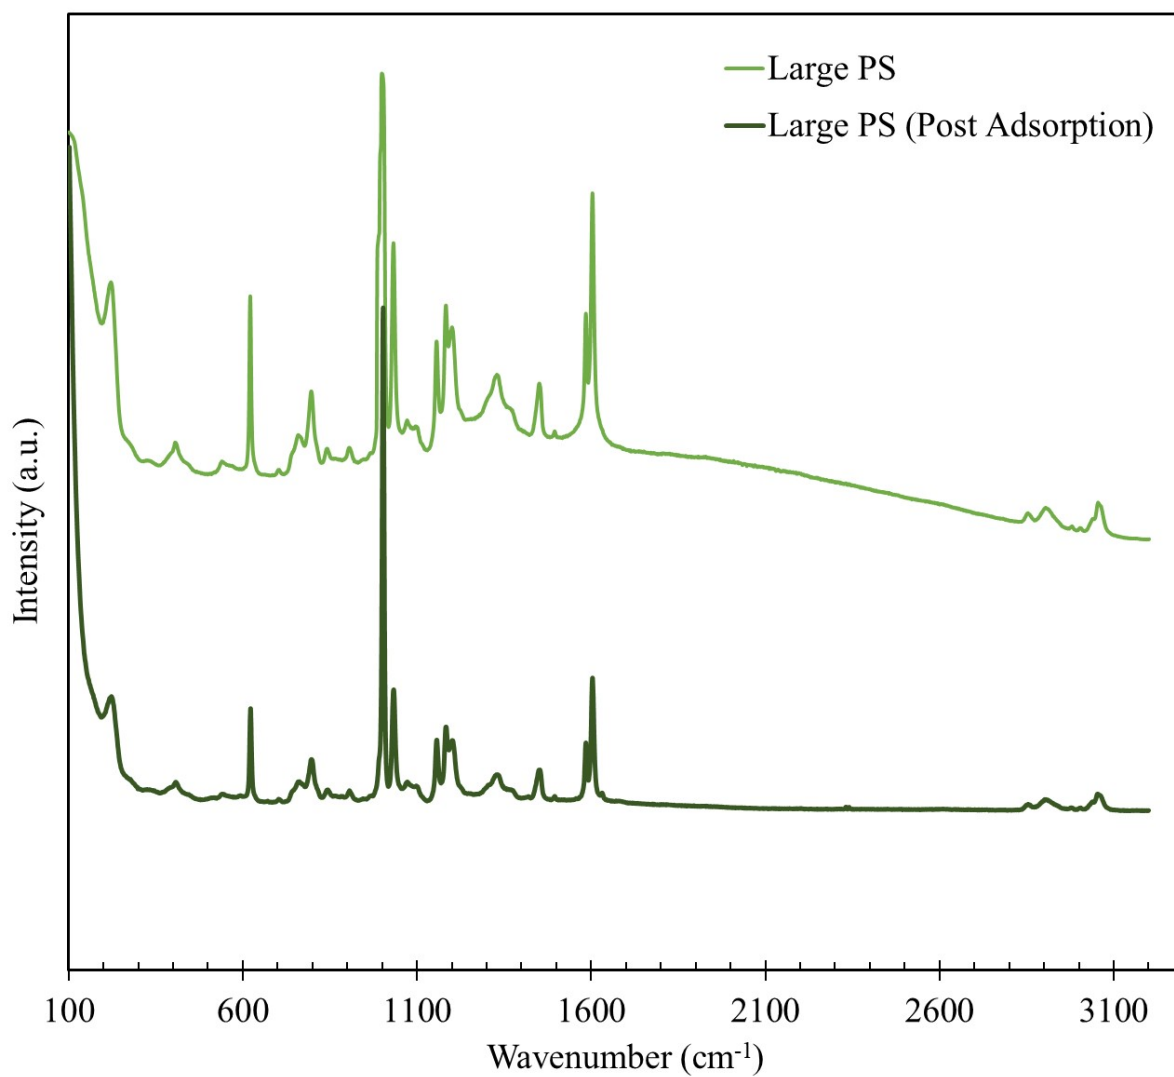

*Fig. S12: Raman Spectra (785 nm laser, 100% laser power, 50XL objective) for Large polystyrene nanoparticles, before and after combined agitation with tributyltin (24 hours).*

S13: Raman Adsorption Mechanism for Medium Nanopolystyrene Particles

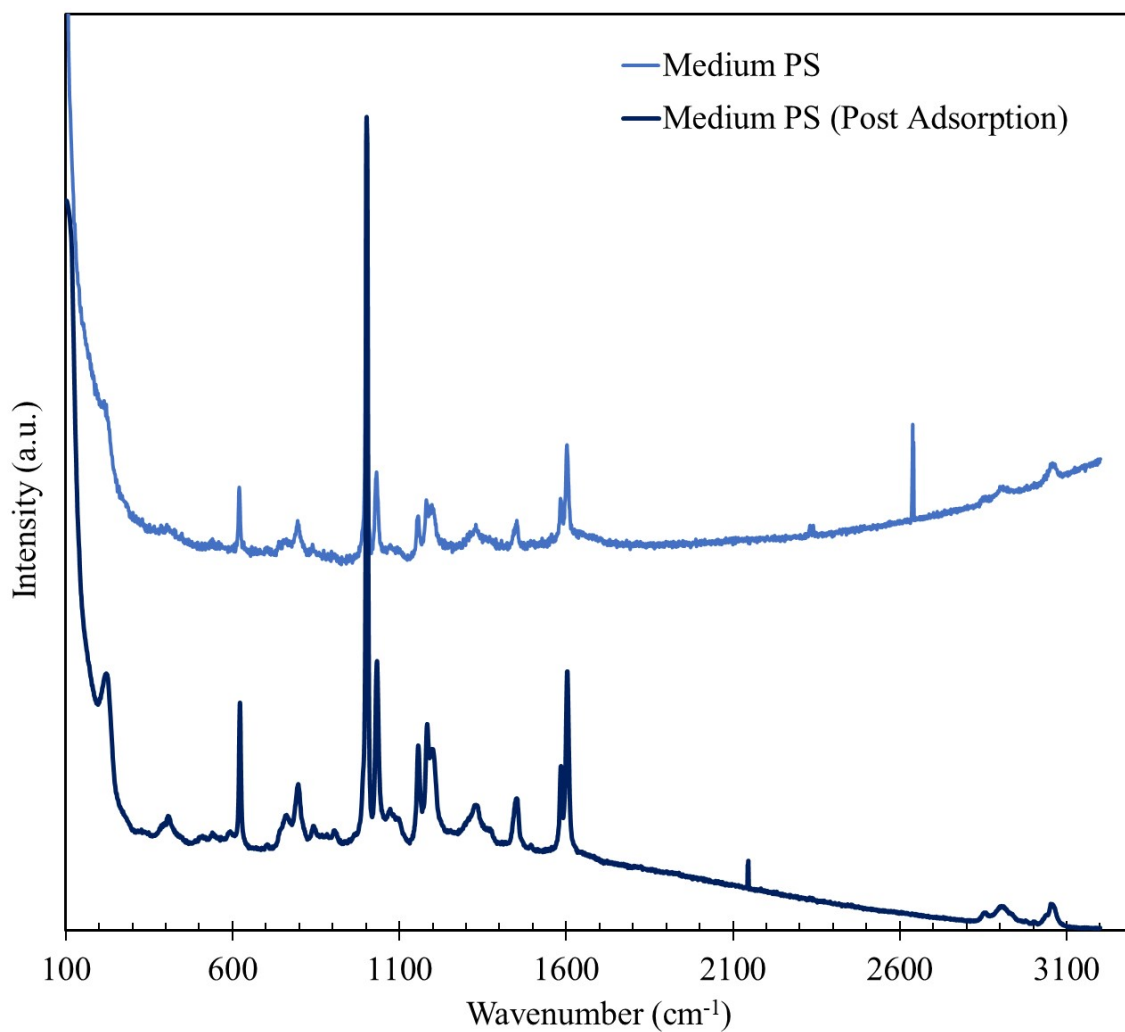

*Fig. S13: Raman Spectra (785 nm laser, 100% laser power, 50XL objective) for Medium polystyrene nanoparticles, before and after combined agitation with tributyltin (24 hours).*

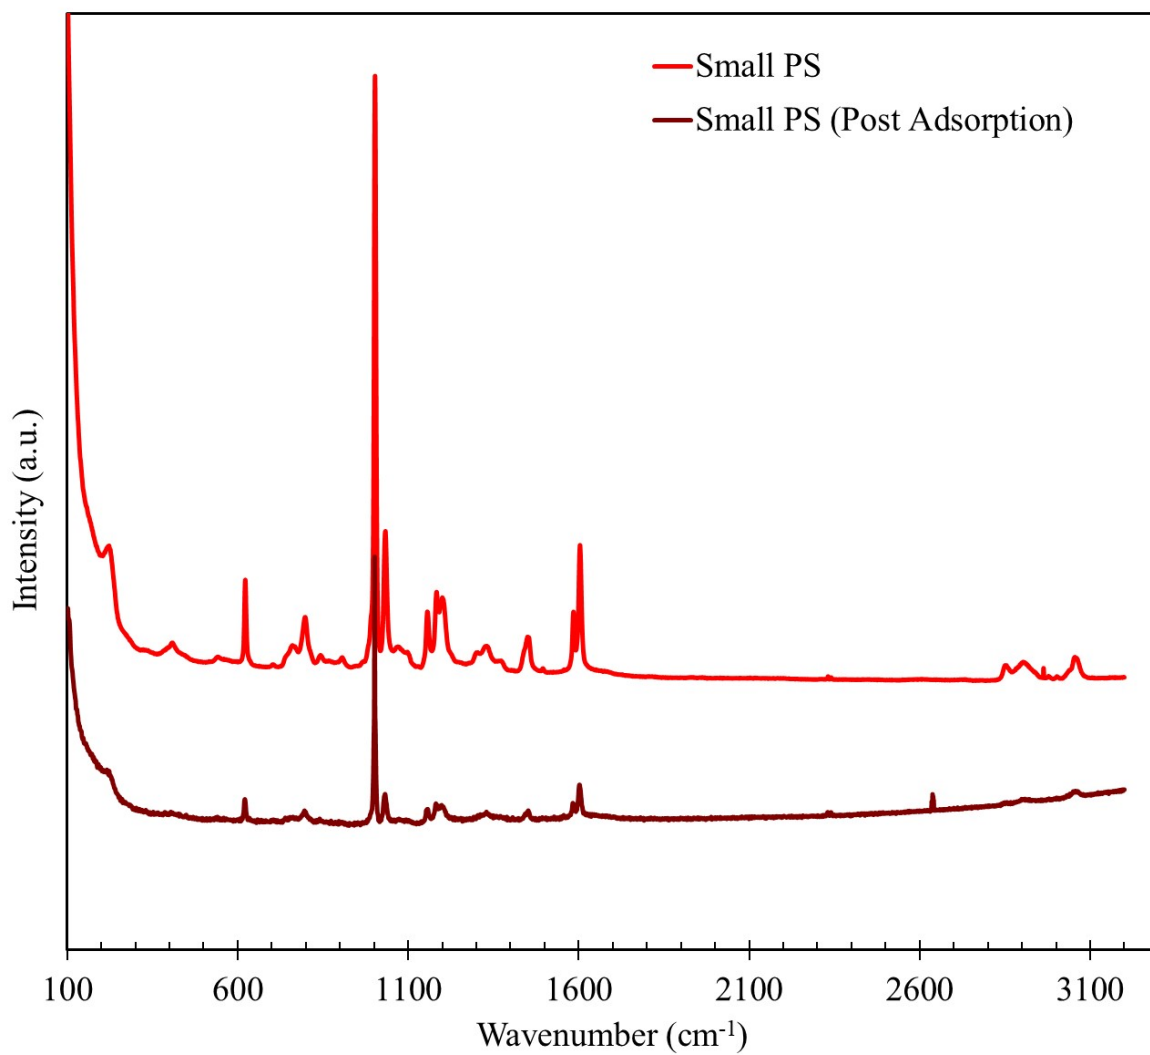

*Fig. S14: Raman Spectra (785 nm laser, 100% laser power, 50XL objective) for Small polystyrene nanoparticles, before and after combined agitation with tributyltin (24 hours).*

## Tables

### S1: Filtration Recovery

*Table S1: TBT (100 ng mL<sup>-1</sup>) filtration spike recoveries during ultrafiltration (30 kDa) and syringe filtration (0.22 and 0.45 μm) methods.*

| Rep.    | Recovery (% TBT Recovered) |                            |                            |
|---------|----------------------------|----------------------------|----------------------------|
|         | Ultrafiltration (30 kDa)   | 0.22 μm Syringe Filtration | 0.45 μm Syringe Filtration |
| 1       | 97.6                       | 100.2                      | 99.4                       |
| 2       | 98.1                       | 101.3                      | 96.8                       |
| 3       | 99.0                       | 99.6                       | 94.8                       |
| 4       | 95.4                       | 97.3                       | 101.6                      |
| 5       | 93.9                       | 100.9                      | 104.3                      |
| 6       | 96.6                       | 98.6                       | 97.5                       |
| 7       | 97.2                       | 97.1                       | 94.9                       |
| 8       | 92.8                       | 97.8                       | 98.0                       |
| 9       | 95.6                       | 102.7                      | 99.9                       |
| 10      | 94.3                       | 101.6                      | 100.6                      |
| Average | 96.1                       | 99.7                       | 98.8                       |
| StDev   | 2.0                        | 1.9                        | 3.0                        |

## S2: Freundlich Parameters

*Table S2: Freundlich parameters calculated following adsorption experiments between tributyltin and 3 sizes of polystyrene nanoparticles.*

| Matrix    | c (LogKf) | Kf       | Kf Error | x (1/n) | 1/n Error |
|-----------|-----------|----------|----------|---------|-----------|
| pH8 (L)   | -0.112    | 0.772681 | 0.220766 | 0.9441  | 0.06      |
| NSW A (L) | 0.2214    | 1.664945 | 0.721157 | 0.5633  | 0.139     |
| NSW B (L) | 0.1197    | 1.317346 | 0.670346 | 0.6962  | 0.091     |
| BW (L)    | -0.4285   | 0.372821 | 0.048378 | 1.3237  | 0.37369   |
| ASW (L)   | -0.1027   | 0.789405 | 0.207382 | 1.0826  | 0.0947    |

  

| Matrix    | c (LogKf) | Kf (ug/g) | Kf Error | x (1/n) | 1/n Error |
|-----------|-----------|-----------|----------|---------|-----------|
| pH8 (M)   | 1.4187    | 26.22406  | 1.602792 | 0.2391  | 0.0231    |
| NSW A (M) | 0.3712    | 2.350715  | 1.069811 | 0.5255  | 0.02268   |
| NSW B (M) | -1.1705   | 0.067531  | 0.031826 | 1.1846  | 0.07002   |
| BW (M)    | -0.2029   | 0.626758  | 0.335321 | 1.1322  | 0.186     |
| ASW (M)   | -0.2462   | 0.567283  | 0.483183 | 1.2411  | 0.371     |

  

| Matrix    | c (LogKf) | Kf (ug/g) | Kf Error | x (1/n) | 1/n Error |
|-----------|-----------|-----------|----------|---------|-----------|
| pH8 (S)   | -0.8569   | 0.139027  | 0.021676 | 1.9493  | 0.2238    |
| NSW A (S) | -0.6457   | 0.2261    | 0.018313 | 1.4451  | 0.06755   |
| NSW B (S) | -         | -         | -        | -       | -         |
| BW (S)    | 1.1954    | 15.68195  | 0.857955 | 0.5832  | 0.1376    |
| ASW (S)   | 0.9875    | 9.71628   | 0.843717 | 0.7012  | 0.1621    |

### S3: Surface Area Normalised Adsorption Capacity

*Table S3: The adsorption capacity of TBT by PS-NP particles ( $Q_{sat}$ ) in artificial seawater (ASW), natural seawater (NSW) and brackish water (BW), calculated in terms of particle surface area.*

|     | $Q_{sat}$ , Surface Area Normalised ( $\mu\text{g cm}^{-2}$ ) |                  |                 |
|-----|---------------------------------------------------------------|------------------|-----------------|
|     | Large PS                                                      | Medium PS        | Small PS        |
| NSW | $6.30 \pm 1.23$                                               | $2.51 \pm 0.18$  | $0.40 \pm 0.08$ |
| BW  | $71.18 \pm 6.34$                                              | $17.38 \pm 0.46$ | $0.79 \pm 0.07$ |
| ASW | $7.22 \pm 1.21$                                               | $3.32 \pm 0.14$  | $0.45 \pm 0.04$ |

S4: QC Recovery

Table S4: Internal QC recoveries for Sn analysis in MilliQ water, artificial seawater (ASW), natural seawater (NSW) and brackish water (BW) by ICP-MS and MP-AES. True Conc. (ppb) refers to the concentration of Sn as prepared by dilution of 1000 ppm Sn CRM (Sigma Aldrich, Germany).

| QC ID      | ICP-MS           |                      |              |
|------------|------------------|----------------------|--------------|
|            | True Conc. (ppb) | Measured Conc. (ppb) | Recovery (%) |
| MilliQ QC1 | 2.48             | 2.1                  | 84.7         |
| MilliQ QC1 | 2.48             | 2.03                 | 81.9         |
| MilliQ QC1 | 2.48             | 2.34                 | 94.4         |
| ASW QC1    | 2.42             | 2.31                 | 95.5         |
| ASW QC1    | 2.42             | 2.33                 | 96.3         |
| ASW QC1    | 2.42             | 2.68                 | 110.7        |
| ASW QC1    | 2.42             | 2.31                 | 95.5         |
| ASW QC1    | 2.42             | 2.1                  | 86.8         |
| ASW QC1    | 2.42             | 2.63                 | 108.7        |
| NSW QC1    | 2.45             | 2.09                 | 85.3         |
| NSW QC1    | 2.45             | 2.43                 | 99.2         |
| NSW QC1    | 2.45             | 2.48                 | 101.2        |
| NSW QC1    | 2.45             | 2.71                 | 110.6        |
| NSW QC1    | 2.45             | 2.26                 | 92.2         |
| NSW QC1    | 2.45             | 2.07                 | 84.5         |
| BW QC1     | 2.52             | 2.52                 | 100.0        |
| BW QC1     | 2.52             | 2.12                 | 84.1         |
| BW QC1     | 2.52             | 2.5                  | 99.2         |
|            | Average          | 2.33                 | 95.04        |
|            | Min              | 2.03                 | 81.9         |
|            | Max              | 2.71                 | 110.7        |
| MilliQ QC2 | 0.25             | 0.21                 | 84.0         |
| MilliQ QC2 | 0.25             | 0.26                 | 104.0        |
| MilliQ QC2 | 0.25             | 0.21                 | 84.0         |
| ASW QC2    | 0.24             | 0.25                 | 104.2        |
| ASW QC2    | 0.24             | 0.22                 | 91.7         |
| ASW QC2    | 0.24             | 0.23                 | 95.8         |
| ASW QC2    | 0.24             | 0.22                 | 91.7         |
| ASW QC2    | 0.24             | 0.2                  | 83.3         |
| ASW QC2    | 0.24             | 0.2                  | 83.3         |
| NSW QC2    | 0.25             | 0.24                 | 96.0         |
| NSW QC2    | 0.25             | 0.22                 | 88.0         |
| NSW QC2    | 0.25             | 0.26                 | 104.0        |
| NSW QC2    | 0.25             | 0.28                 | 112.0        |
| NSW QC2    | 0.25             | 0.24                 | 96.0         |
| NSW QC2    | 0.25             | 0.22                 | 88.0         |
| BW QC2     | 0.26             | 0.27                 | 103.8        |
| BW QC2     | 0.26             | 0.28                 | 107.7        |
| BW QC2     | 0.26             | 0.24                 | 92.3         |



|         |      |       |
|---------|------|-------|
| Average | 0.24 | 94.99 |
| Min     | 0.2  | 83.3  |
| Max     | 0.28 | 112.0 |

| QC ID      | MP-AES           |                      |              |
|------------|------------------|----------------------|--------------|
|            | True Conc. (ppm) | Measured Conc. (ppm) | Recovery (%) |
| MilliQ QC1 | 25.02            | 26.35                | 105.3        |
| MilliQ QC1 | 25.02            | 24.61                | 98.4         |
| MilliQ QC1 | 25.02            | 24.22                | 96.8         |
| MilliQ QC1 | 25.02            | 26.08                | 104.2        |
| MilliQ QC1 | 25.02            | 25.03                | 100.0        |
| ASW QC1    | 24.89            | 24.52                | 98.5         |
| ASW QC1    | 24.89            | 25.97                | 104.3        |
| ASW QC1    | 24.89            | 25.63                | 103.0        |
| ASW QC1    | 24.89            | 26.9                 | 108.1        |
| ASW QC1    | 24.89            | 26.12                | 104.9        |
| ASW QC1    | 24.89            | 25.07                | 100.7        |
| NSW QC1    | 25.33            | 25.8                 | 101.9        |
| NSW QC1    | 25.33            | 27.03                | 106.7        |
| NSW QC1    | 25.33            | 25.77                | 101.7        |
| NSW QC1    | 25.33            | 25.03                | 98.8         |
| NSW QC1    | 25.33            | 26.05                | 102.8        |
| NSW QC1    | 25.33            | 24.23                | 95.7         |
| BW QC1     | 24.61            | 24.82                | 100.9        |
| BW QC1     | 24.61            | 24.69                | 100.3        |
| BW QC1     | 24.61            | 26.4                 | 107.3        |
| BW QC1     | 24.61            | 26.67                | 108.4        |
| Average    |                  | 25.57                | 102.32       |
| Min        |                  | 24.22                | 95.7         |
| Max        |                  | 27.03                | 108.4        |
| MilliQ QC2 | 2.62             | 3.24                 | 123.7        |
| MilliQ QC2 | 2.62             | 2.8                  | 106.9        |
| MilliQ QC2 | 2.62             | 2.24                 | 85.5         |
| MilliQ QC2 | 2.62             | 2.7                  | 103.1        |
| MilliQ QC2 | 2.62             | 2.06                 | 78.6         |
| ASW QC2    | 2.54             | 2.26                 | 86.3         |
| ASW QC2    | 2.54             | 3.29                 | 125.6        |
| ASW QC2    | 2.54             | 3.24                 | 123.7        |
| ASW QC2    | 2.54             | 2.72                 | 103.8        |
| ASW QC2    | 2.54             | 2.15                 | 82.1         |
| ASW QC2    | 2.54             | 3.41                 | 130.2        |
| NSW QC2    | 2.43             | 2.6                  | 99.2         |
| NSW QC2    | 2.43             | 2.97                 | 113.4        |
| NSW QC2    | 2.43             | 2.95                 | 112.6        |
| NSW QC2    | 2.43             | 3.44                 | 131.3        |

|         |         |      |        |
|---------|---------|------|--------|
| NSW QC2 | 2.43    | 3.06 | 116.8  |
| NSW QC2 | 2.43    | 2.48 | 94.7   |
| BW QC2  | 2.51    | 3.32 | 126.7  |
| BW QC2  | 2.51    | 2.12 | 80.9   |
| BW QC2  | 2.51    | 2.81 | 107.3  |
| BW QC2  | 2.51    | 3.33 | 127.1  |
|         | Average | 2.82 | 107.58 |
|         | Min     | 2.06 | 78.6   |
|         | Max     | 3.44 | 131.3  |
